# Supplementary material for: Emerging contaminants: A One Health perspective
Source: PubMed Central journal article supplement — Innovation (Camb). 2024 Mar 13;5(4):100612. doi: 10.1016/j.xinn.2024.100612 (PMC11096751; doi:10.1016/j.xinn.2024.100612), 2024-03-13
Supplement: mmc1.pdf [file mmc1.pdf]

## Supplemental Information

### Emerging contaminants: A One Health perspective

Fang Wang, Leilei Xiang, Kelvin Sze-Yin Leung, Martin Elsner, Ying Zhang, Yuming Guo, Bo Pan, Hongwen Sun, Taicheng An, Guangguo Ying, Bryan W. Brooks, Deyi Hou, Damian E. Helbling, Jianqiang Sun, Hao Qiu, Timothy M. Vogel, Wei Zhang, Yanzheng Gao, Myrna J. Simpson, Yi Luo, Scott X. Chang, Guanyong Su, Bryan M. Wong, Tzung-May Fu, Dong Zhu, Karl J. Jobst, Chengjun Ge, Frederic Coulon, Jean Damascene Harindintwali, Xiankui Zeng, Haijun Wang, Yuhao Fu, Zhong Wei, Rainer Lohmann, Changer Chen, Yang Song, Concepcion Sanchez-Cid, Yu Wang, Ali El-Naggar, Yiming Yao, Yanran Huang, Japhet Cheuk-Fung Law, Chenggang Gu, Huizhong Shen, Yanpeng Gao, Chao Qin, Hao Li, Tong Zhang, Natàlia Corcoll, Min Liu, Daniel S. Alessi, Hui Li, Kristian K. Brandt, Yolanda Pico, Cheng Gu, Jianhua Guo, Jianqiang Su, Philippe Corvini, Mao Ye, Teresa Rocha-Santos, Huan He, Yi Yang, Meiping Tong, Weina Zhang, Fidèle Suanon, Ferdi Brahusi, Zhenyu Wang, Syed A. Hashsham, Marko Virta, Qingbin Yuan, Gaofei Jiang, Louis A. Tremblay, Qingwei Bu, Jichun Wu, Willie Peijnenburg, Edward Topp, Xinde Cao, Xin Jiang, Minghui Zheng, Taolin Zhang, Yongming Luo, Lizhong Zhu, Xiangdong Li, Damià Barceló, Jianmin Chen, Baoshan Xing, Wulf Amelung, Zongwei Cai, Ravi Naidu, Qirong Shen, Janusz Pawliszyn, Yong-guan Zhu, Andreas Schaeffer, Matthias C. Rillig, Fengchang Wu, Gang Yu, and James M. Tiedje

Table S1. Some examples of advanced methods for the detection and analysis of emerging contaminants

| Techniques              | Detectors | Target analytes                                           | Sample matrix                          | Sample pretreatment           | Identification | Quantification | References          |
|-------------------------|-----------|-----------------------------------------------------------|----------------------------------------|-------------------------------|----------------|----------------|---------------------|
| GC-QTOF                 | HRMS      | N-(1,3-dimethylbutyl)-N'-phenyl-p-phenylenediamine (6PPD) | Tire tread wear particle leachates     | Fractionation                 | ✓              |                | (Tian et al., 2021) |
|                         |           | Organophosphate flame retardants                          | Air particulates                       | Pressurized liquid extraction | ✓              |                | (Liu et al., 2021)  |
| LC-QTOF/<br>LC-Orbitrap | HRMS      | 6PPD-quinone                                              | Diluted extracts of roadway runoff and | Fractionation                 | ✓              | ✓              | (Tian et al., 2021) |

|                                       |          |                                                                                |                                                                             |   |  |                         |
|---------------------------------------|----------|--------------------------------------------------------------------------------|-----------------------------------------------------------------------------|---|--|-------------------------|
|                                       |          |                                                                                | receiving<br>water<br>samples                                               |   |  |                         |
| Endocrine-<br>disrupting<br>chemicals |          | Source and<br>drinking<br>water<br>sampled<br>from major<br>rivers             | Solid-phase<br>extraction                                                   | ✓ |  | (Li et al.,<br>2023)    |
| Thiol<br>DBPs                         | reactive | Waters<br>treated using<br>both<br>chemical<br>disinfection<br>and<br>advanced | <i>Solid-phase<br/>extraction,<br/>glutathione<br/>(GSH)<br/>incubation</i> | ✓ |  | (Yeung et<br>al., 2023) |

|            |       | oxidation processes                                                                               |                            |                      |   |                       |
|------------|-------|---------------------------------------------------------------------------------------------------|----------------------------|----------------------|---|-----------------------|
| IM-QTOF    | HRMS  | Bisphenols, alternative plasticizers, organophosphate flame retardants, perfluoroalkyl substances | Urine samples              | Dilute-and-shoot     | ✓ | (Belova et al., 2021) |
| LC-IM-QTOF | HRMS  | Per- and polyfluoroalkyl substances                                                               | Aqueous film-forming foams | Dilute-and-shoot     | ✓ | (Luo et al., 2020)    |
| FT-ICR-MS  | UHRMS | Unknown DBPs                                                                                      | Chlorinated and            | Ultrafiltration, XAD | ✓ | (Dong et al., 2023)   |

|               |      |                               |                                                                                                       |                                      |   |   |                                 |
|---------------|------|-------------------------------|-------------------------------------------------------------------------------------------------------|--------------------------------------|---|---|---------------------------------|
|               |      |                               | chloraminat<br>ed drinking<br>water                                                                   | Resin<br>Extraction                  |   |   |                                 |
| SFC-<br>QTOF  | HRMS | Halogenated<br>sulfonic acids | Water<br>samples<br>from<br>drinking<br>water<br>production,<br>tap water,<br>and<br>swimming<br>pool | Freeze-<br>drying                    | ✓ | ✓ | (Nihemai<br>ti et al.,<br>2023) |
| Pyr-GC-<br>MS | MS   | Pyrolysis<br>products of MP   | Sea water,<br>beach sand,<br>sediment,                                                                | Filtering,<br>density<br>separation, | ✓ | ✓ | (Zhang et<br>al., 2023)         |

|          |                                                                                                         |                              |                          |                                               |   |   |  |  |                              |
|----------|---------------------------------------------------------------------------------------------------------|------------------------------|--------------------------|-----------------------------------------------|---|---|--|--|------------------------------|
|          |                                                                                                         |                              |                          | air, rice, solvent-based seafood, human blood |   |   |  |  |                              |
| spICP-MS | MS                                                                                                      | MPs                          | Consumer products        | Filtration and dilution                       | ✓ |   |  |  | (Laborda et al., 2021)       |
|          | HRMS                                                                                                    | MPs                          | Aqueous suspensions      | Dilute-and-shoot                              | ✓ |   |  |  | (Hendriks and Mitrano, 2023) |
| NMR      | Various nuclei ( $^1\text{H}$ , $^{13}\text{C}$ , $^{15}\text{N}$ , $^{19}\text{F}$ , $^{31}\text{P}$ ) | Metals and organic compounds | Solution, solid and gels | Various, depending on the sample type         | ✓ | ✓ |  |  | (Simpson and Simpson, 2014)  |

|          |                            |                                          |                 |                             |                             |   |   |                         |
|----------|----------------------------|------------------------------------------|-----------------|-----------------------------|-----------------------------|---|---|-------------------------|
| Antibody | Electrochemical            | -                                        | PAHs            | Oysters interstitial fluid  | Filtration                  | ✓ | ✓ | (Prossner et al., 2022) |
|          | Electrochemical            | Metallic nanoparticles                   | Cocaine         | Urine, sweat, saliva, serum | -                           | ✓ | ✓ | (Sanli et al., 2020)    |
| Aptamer  | UV-Vis absorption spectrum | Cage Au@Au nanoparticles                 | Chloramphenicol | Honey                       | Dissolve in ultrapure water | ✓ | ✓ | (Zhou et al., 2022)     |
|          | Electrochemical            | Graphene@black phosphorus nanocomposites | Bisphenol A     | Wastewater                  | Filtration                  | ✓ | ✓ | (Gao et al., 2022)      |

|                       |                                                                 |              |                    |                               |   |   |                             |                          |
|-----------------------|-----------------------------------------------------------------|--------------|--------------------|-------------------------------|---|---|-----------------------------|--------------------------|
| Electrochemical       | Poly (propylene imine) dendrimer-carbon nanofiber nanocomposite | Bisphenol A  | Water              | Dilution with Tris-HCl buffer | ✓ | ✓ | (Tsekeli et al., 2021)      |                          |
| Photo-electrochemical | Au/Bi <sub>24</sub> O <sub>31</sub> Br <sub>10</sub>            | Enrofloxacin | Sewage river water | -                             | ✓ | ✓ | (Dong et al., 2022)         |                          |
| Algae                 | Luminescence device                                             | Microfluidic | Pesticides         | Tap water                     | - | ✓ | ✓                           | (Tahirbegi et al., 2017) |
| Luminescence          | Porous silicone                                                 | Herbicides   | Aquatic samples    | -                             | ✓ | ✓ | (Haigh-Flórez et al., 2014) |                          |



The table provides a selection of advanced methods for detecting and analyzing emerging contaminants, but it's important to recognize that there are numerous other methods available for this purpose. While the table illustrates specific examples or groups of contaminants analyzed by each method, it's essential to understand that one method can be utilized to analyze multiple emerging contaminants.

Belova, L., Caballero-Casero, N., van Nuijs, A.L., and Covaci, A. (2021). Ion mobility-high-resolution mass spectrometry (IM-HRMS) for the analysis of contaminants of emerging concern (CECs): database compilation and application to urine samples. *Analytical Chemistry* 93, 6428-6436.

Dong, H., Cuthbertson, A.A., Plewa, M.J., Weisbrod, C.R., McKenna, A.M., and Richardson, S.D. (2023). Unravelling High-Molecular-Weight DBP Toxicity Drivers in Chlorinated and Chloraminated Drinking Water: Effect-Directed Analysis of Molecular Weight Fractions. *Environmental science & technology* 57, 18788-18800.

Dong, J., Xu, L., Dang, S., Sun, S., Zhou, Y., Yan, P., Yan, Y., and Li, H. (2022). A sensitive photoelectrochemical aptasensor for enrofloxacin detection based on plasmon-sensitized bismuth-rich bismuth oxyhalide. *Talanta* 246, 123515.

Gao, Y., Wang, L., Zhang, X., Shi, C., Ma, L., Zhang, X., and Wang, G. (2022). Similarities and differences among the responses to three chlorinated organophosphate esters in earthworm: Evidences from biomarkers, transcriptomics and metabolomics. *Science of The Total Environment* 815, 152853.

Haigh-Flórez, D., de la Hera, C., Costas, E., and Orellana, G. (2014). Microalgae dual-head biosensors for selective detection of herbicides with fiber-optic luminescent O<sub>2</sub> transduction. *Biosensors and Bioelectronics* 54, 484-491.

Hendriks, L., and Mitrano, D.M. (2023). Direct Measurement of Microplastics by Carbon Detection via Single Particle ICP-TOFMS in Complex Aqueous Suspensions. *Environmental science & technology* 57, 7263-7272.

Laborda, F., Trujillo, C., and Lobinski, R. (2021). Analysis of microplastics in consumer products by single particle-inductively coupled plasma mass spectrometry using the carbon-13 isotope. *Talanta* 221, 121486.

Li, Q., Wang, L., Jia, Y., Yang, M., Zhang, H., and Hu, J. (2023). Nontargeted Analysis Reveals a Broad Range of Bioactive Pollutants in Drinking Water by Estrogen Receptor Affinity–Mass Spectrometry. *Environmental science & technology* 57, 21327-21336.

Liu, Q., Li, L., Zhang, X., Saini, A., Li, W., Hung, H., Hao, C., Li, K., Lee, P., and Wentzell, J.J. (2021). Uncovering global-scale risks from commercial chemicals in air. *Nature* 600, 456-461.

Luo, Y.-S., Aly, N.A., McCord, J., Strynar, M.J., Chiu, W.A., Dodds, J.N., Baker, E.S., and Rusyn, I. (2020). Rapid characterization of emerging per-and polyfluoroalkyl substances in aqueous film-forming foams using ion mobility spectrometry–mass spectrometry. *Environmental science & technology* 54, 15024-15034.

Nihemaiti, M., Icker, M., Seiwert, B., and Reemtsma, T. (2023). Revisiting Disinfection Byproducts with Supercritical Fluid Chromatography-High Resolution-Mass Spectrometry: Identification of Novel Halogenated Sulfonic Acids in Disinfected Drinking Water. *Environmental science & technology* 57, 3527-3537.

Prossner, K.M., Vadas, G.G., Harvey, E., and Unger, M.A. (2022). A novel antibody-based biosensor method for the rapid measurement of PAH contamination in oysters. *Environmental technology & innovation* 28, 102567.

Sanli, S., Moulahoum, H., Ugurlu, O., Ghorbanizamani, F., Gumus, Z.P., Evran, S., Coskunol, H., and Timur, S. (2020). Screen printed electrode-based biosensor functionalized with magnetic cobalt/single-chain antibody fragments for cocaine biosensing in different matrices. *Talanta* 217, 121111.

Simpson, M.J., and Simpson, A.J. (2014). *NMR spectroscopy: a versatile tool for environmental research* (John Wiley & Sons).

Tahirbegi, I.B., Ehgartner, J., Sulzer, P., Zieger, S., Kasjanow, A., Paradiso, M., Strobl, M., Bouwes, D., and Mayr, T. (2017). Fast pesticide detection inside microfluidic device with integrated optical pH, oxygen sensors and algal fluorescence. *Biosensors and Bioelectronics* 88, 188-195.

Tian, Z., Zhao, H., Peter, K.T., Gonzalez, M., Wetzel, J., Wu, C., Hu, X., Prat, J., Mudrock, E., and Hettinger, R. (2021). A ubiquitous tire rubber-derived chemical induces acute mortality in coho salmon. *Science (New York, NY)* 371, 185-189.

Tsekeli, T.R., Sebokolodi, T.I., Sipuka, D.S., Olorundare, F.O., Akanji, S.P., Nkosi, D., and Arotiba, O.A. (2021). A poly (propylene imine) dendrimer-carbon nanofiber based aptasensor for bisphenol A in water. *Journal of Electroanalytical Chemistry* 901, 115783.

Yeung, K., Moore, N., Sun, J., Taylor-Edmonds, L., Andrews, S., Hofmann, R., and Peng, H. (2023). Thiol Reactome: A Nontargeted Strategy to Precisely Identify Thiol Reactive Drinking Water Disinfection Byproducts. *Environmental science & technology*.

Zhang, J., Fu, D., Feng, H., Li, Y., Zhang, S., Peng, C., Wang, Y., Sun, H., and Wang, L. (2023). Mass spectrometry detection of environmental microplastics: Advances and challenges. *TrAC Trends in Analytical Chemistry*, 117472.

Zhou, C., Sun, C., Zou, H., and Li, Y. (2022). Plasma colorimetric aptasensor for the detection of chloramphenicol in honey based on cage Au@AuNPs and cascade hybridization chain reaction. *Food Chemistry* 377, 132031.
